# Supplementary material
Source: publisher figshare collection journal article supplement (https://acs.figshare.com/ndownloader/files/18116294)
Supplement: Supplementary file 1 [file 18116294]

**Supporting Information for**  
**Geometric and Electronic Engineering of Mn doped Cu(OH)<sub>2</sub>**  
**Hexagonal Nanorings for Superior Oxygen Evolution Reaction**  
**Electrocatalysis**

Hui Xu, Hongyuan Shang , Junwei Di <sup>\*</sup>, and Yukou Du <sup>\*</sup>

*College of Chemistry, Chemical Engineering and Materials Science, Soochow*  
*University, Suzhou 215123, PR China*

*\* Corresponding authors: Tel: 86-512-65880089, Fax: 86-512-65880089;*

*E-mail: djw@suda.edu.cn (J. Di); duyk@suda.edu.cn (Y. Du)*

## Supplementary Method

### Experimental Section

**Synthesis of Mn(OH)<sub>2</sub> nanoplates:** Synthesis of Mn(OH)<sub>2</sub> nanoplates was based on the reported method with appropriate modification.<sup>1</sup> 158 mg of KMnO<sub>4</sub> was dissolved in 20 mL deionized water at room temperature and 2.5 mL of hydrazine hydrate (N<sub>2</sub>H<sub>4</sub>, 80%) was added into the above solution slowly, and then sonicating for 1 min. The obtained suspension was transferred into a 50 mL Teflon-lined stainless steel autoclave, sealed, and maintained at 180 °C for 12 h and then air-cooled to room temperature. The product was centrifuged and thoroughly washed with ethanol/water for several times, and then dispersed in 10 mL deionized water for further use.

**Synthesis of Mn doped Cu(OH)<sub>2</sub> hexagonal nanorings:** 2 mL of Mn(OH)<sub>2</sub> nanoplates precursor was re-dispersed into 10 mL of 0.05 M CuCl<sub>2</sub>·2H<sub>2</sub>O solution and stirred at 25°C for 12 h. The green precipitate was centrifuged and washed with water for several times before dried. For comparison, we have also varied the addition of Mn(OH)<sub>2</sub> nanoplates precursor to 1 mL and 4 mL, and the products were denoted as Mn doped Cu(OH)<sub>2</sub>-1 mL and Mn doped Cu(OH)<sub>2</sub>-4 mL, respectively.

**Synthesis of Cu(OH)<sub>2</sub>:** The synthesis of Cu(OH)<sub>2</sub> is also similar to the Mn doped Cu(OH)<sub>2</sub> hexagonal nanorings but changing the addition of 2 mL of Mn(OH)<sub>2</sub> nanoplates to NaOH solution. The products were collected by centrifugation and washed with water and ethanol three times, respectively. The obtained product was ready for further processing and characterization.

**Materials characterizations:** The transmission electron microscopy (TEM) images were performed utilizing FEI Tecnai T20 microscope (200 kV), and high-resolution TEM (HRTEM) images and element mapping analyses results were obtained on an FEI Tecnai F30 microscope (300 kV) with an Energy Dispersive Spectrometer (EDX). Scanning electron microscopy (SEM) images were taken on a Merlin Compact scanning electron microscope. Powder X-ray diffraction (PXRD) patterns were obtained using a Rigaku X-ray diffractometer equipped with Cu-Kα radiation at 40 kV and 100 mA, respectively. XPS measurements were performed on Imaging Photoelectron Spectrometer (Axis Ultra DLD, Kratos Analytical Ltd.) using monochromatized Al Kα anode (Al Kα, hv=1486.7 eV). All the collected spectra were calibrated with contaminated C 1s peak at 284.8 eV. The EPR measurements were performed on a Bruker Elexsys E580 X-band

pulsed-EPR spectrometer.

**Electrode fabrication:** The sample ink was prepared by mixing the catalyst (1 mg), propanol, and Nafion (0.5 wt%, 20  $\mu\text{L}$ ) followed by sonication for 30 min. Then the ink was drop-casted onto a Ni foam (2  $\text{cm}^2$ ) and used as the working electrode for measurements. The catalyst loading was determined to be  $\sim 0.5 \text{ mg cm}^{-2}$ . The electrochemical measurements were conducted on a standard three electrode system with a CHI 760E electrochemistry workstation using 1.0 M KOH solution as electrolyte. A three-electrode electrochemical cell was employed with Ag/AgCl as the reference electrode (3 M KCl), as-prepared sample modified glassy carbon as the working electrode, and carbon rod as the counter electrode. Before the electrocatalytic activity tests, all catalysts were conditioned by potential cycling over 60 cycles at a scan rate of  $50 \text{ mV s}^{-1}$  in 1 M KOH. Linear sweep voltammetry (LSV) curves were obtained by sweeping the potential from 1 to 1.7 V (vs. RHE) at room temperature at a sweep rate of  $5 \text{ mV s}^{-1}$ . The electrochemical impedance spectra (EIS) measurement was performed in the same configuration at room temperature over a frequency range from 0.1 Hz to 1000 kHz. Long-term stability is evaluated by the LSV after continuous cyclic voltammetry (CV) measurement for 3000 cycles and prolonged chronopotentiometry test at the current density of  $10 \text{ mA cm}^{-2}$  for long period.

**Calculation of ECSA:** The calculation of the electrochemical surface areas (ECSA) are based on the measured double layer capacitance of the electrode in 1.0 M KOH according to previous published report. Briefly, a potential range where no apparent Faradaic process happened was determined firstly using the static cyclic voltammetry (CV). The charging current  $i_c$  was measured from the CVs at different scan rates. The relation between  $i_c$ , the scan rate ( $v$ ) and the double layer capacitance ( $C_{DL}$ ) was given in eq 1. Thus the  $C_{DL}$  is then calculated according to:  $C_{DL} = d(\Delta j(0 \text{ V vs. RHE}))/2dv$ .

$$i_c = v C_{DL} \quad (1)$$

Therefore, the slope of  $i_c$  as a function of  $v$  will give a straight line with the slope equal to  $C_{DL}$ .

$$\text{ECSA} = C_{DL} / C_S \quad (2)$$

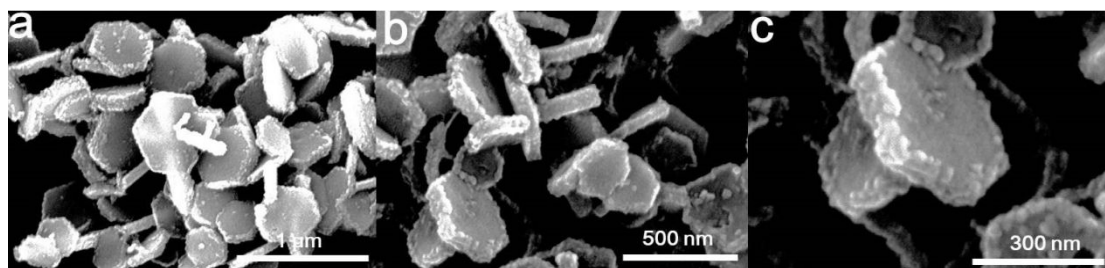

**Figure S1.** (a-c) Representative SEM images of  $\text{Mn}(\text{OH})_2$  nanoplates with different magnifications.

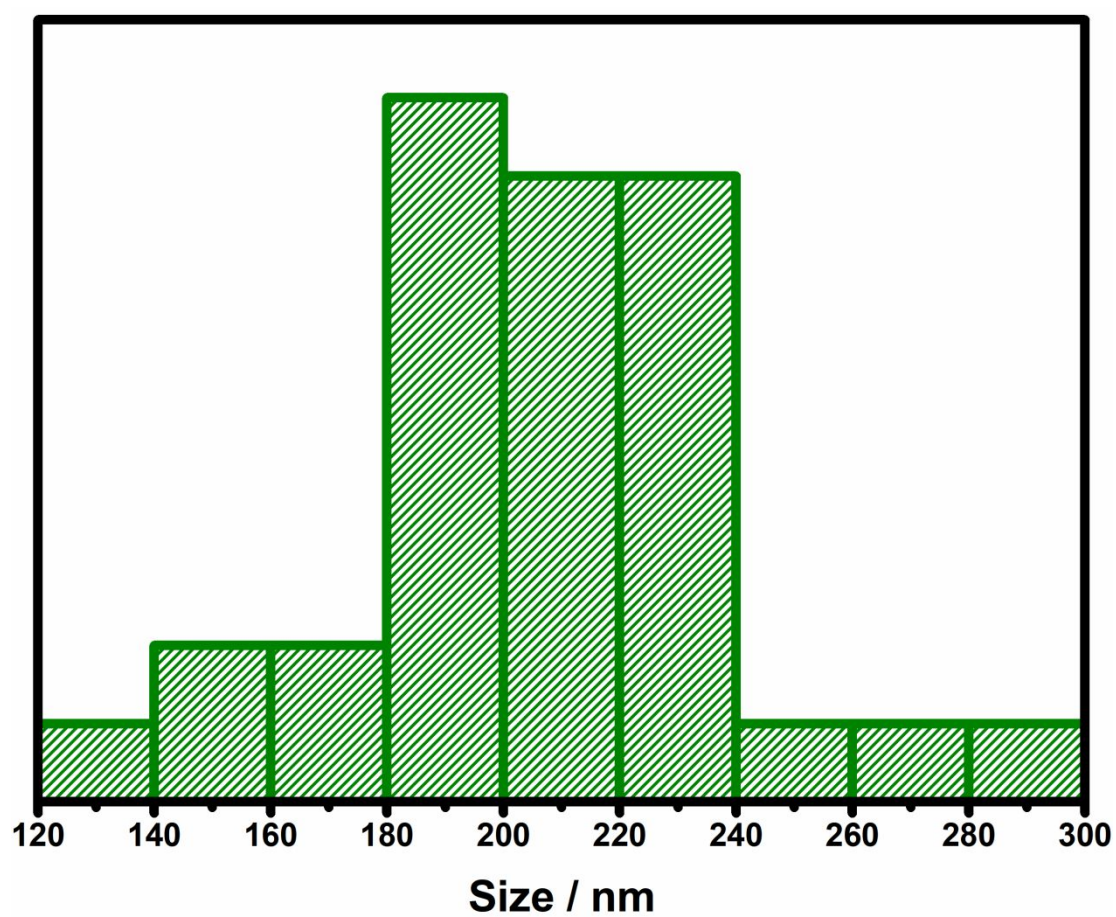

**Figure S2.** Size distribution of  $\text{Mn}(\text{OH})_2$  nanoplates.

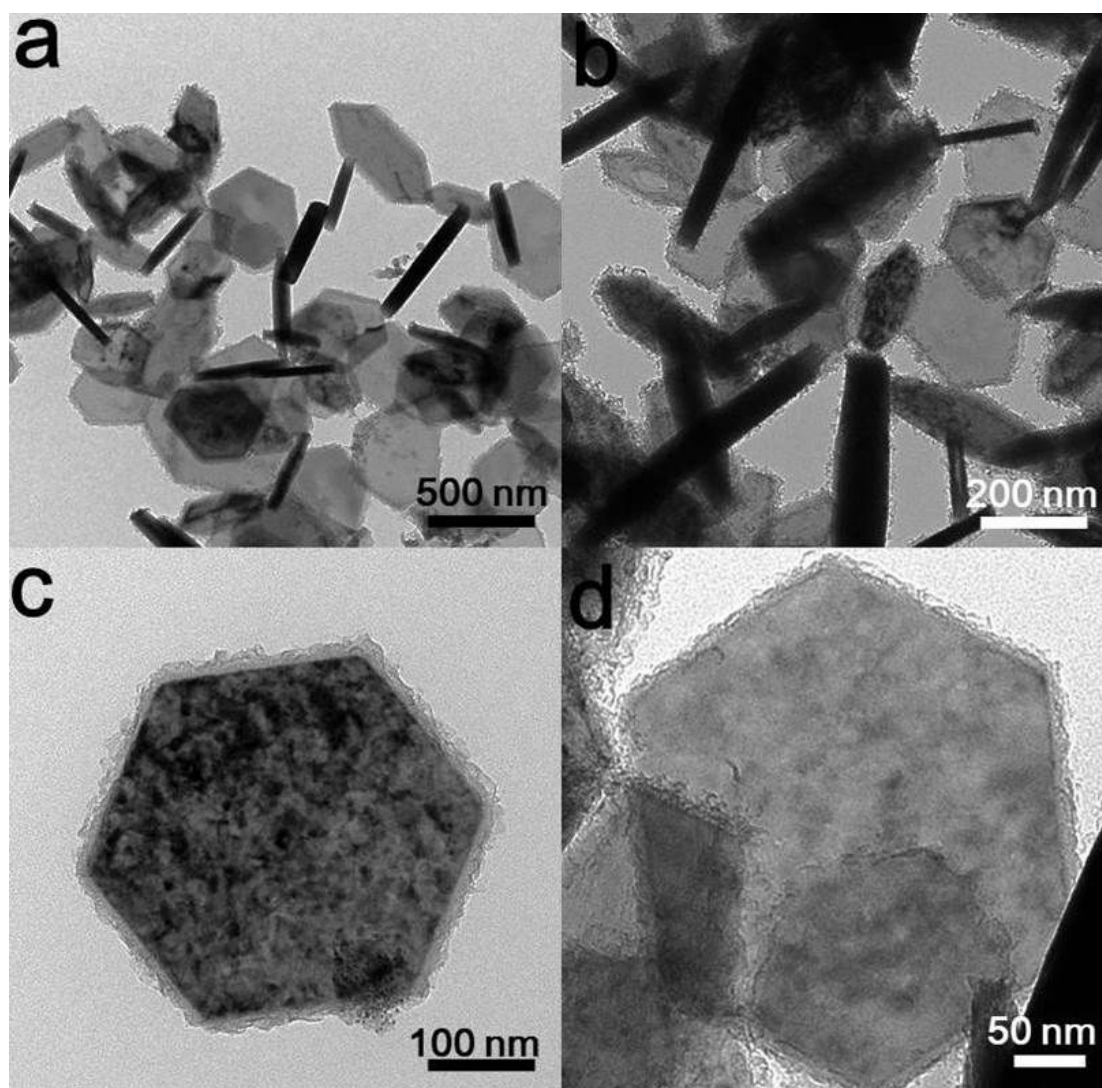

**Figure S3.** (a-d) Representative TEM images of Mn(OH)<sub>2</sub> nanoplates.

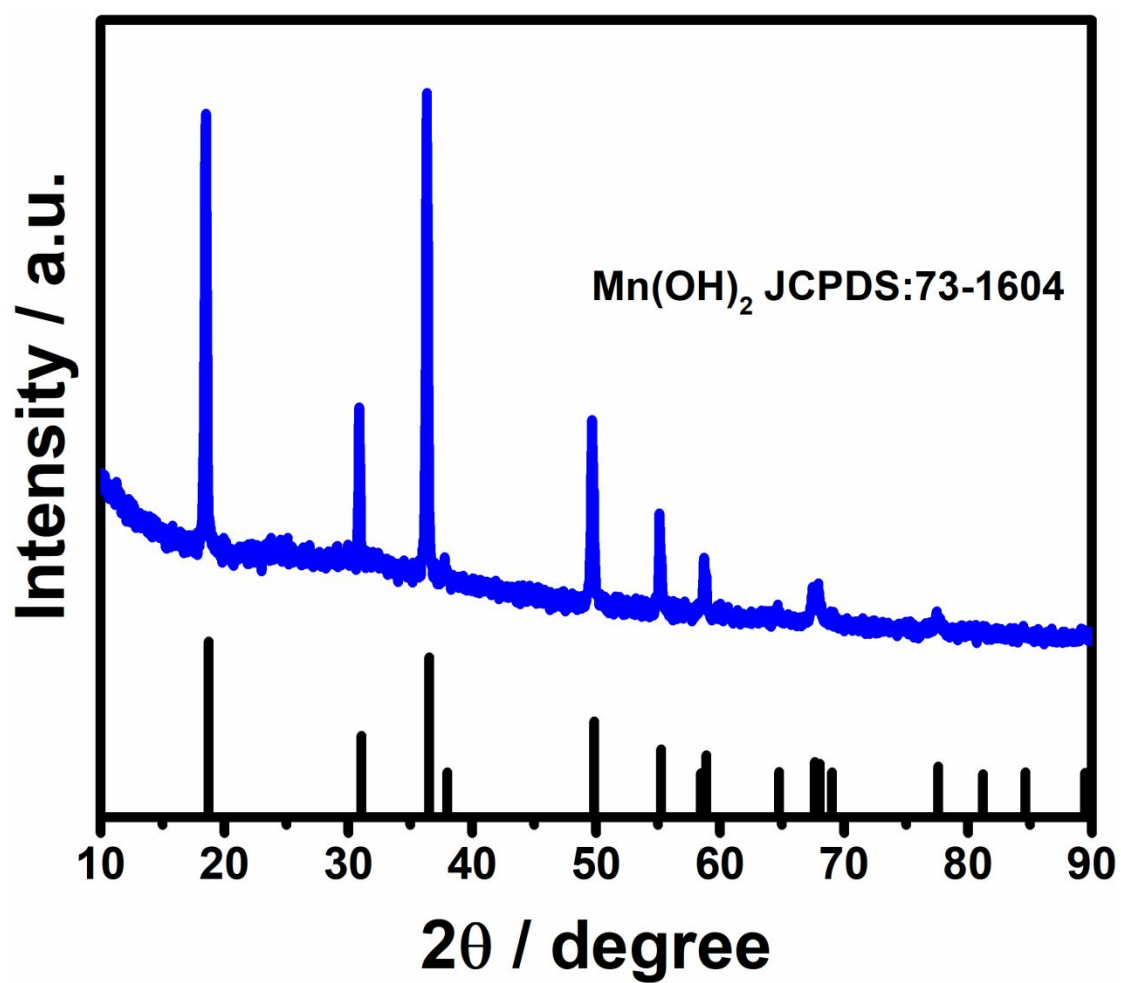

**Figure S4.** XRD pattern of Mn(OH)<sub>2</sub> nanoplates.

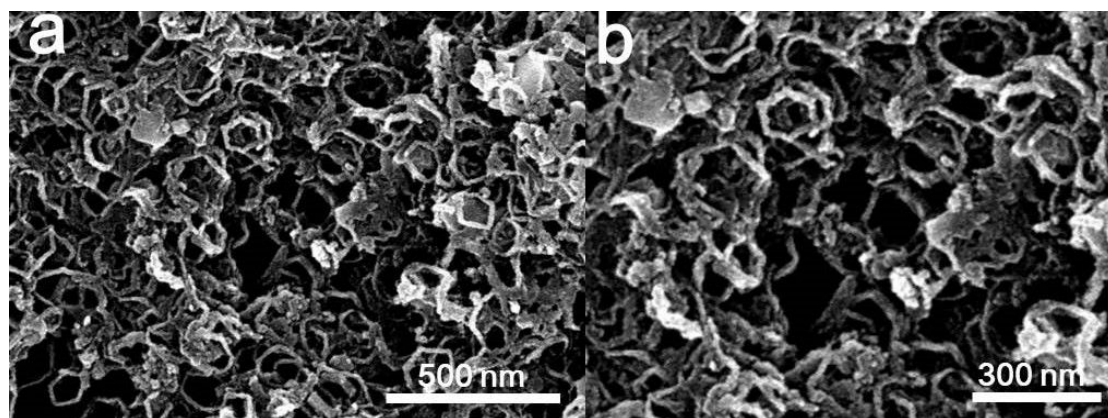

**Figure S5.** Representative SEM images of (a and b) Mn doped Cu(OH)<sub>2</sub> hexagonal nanorings with different magnifications.



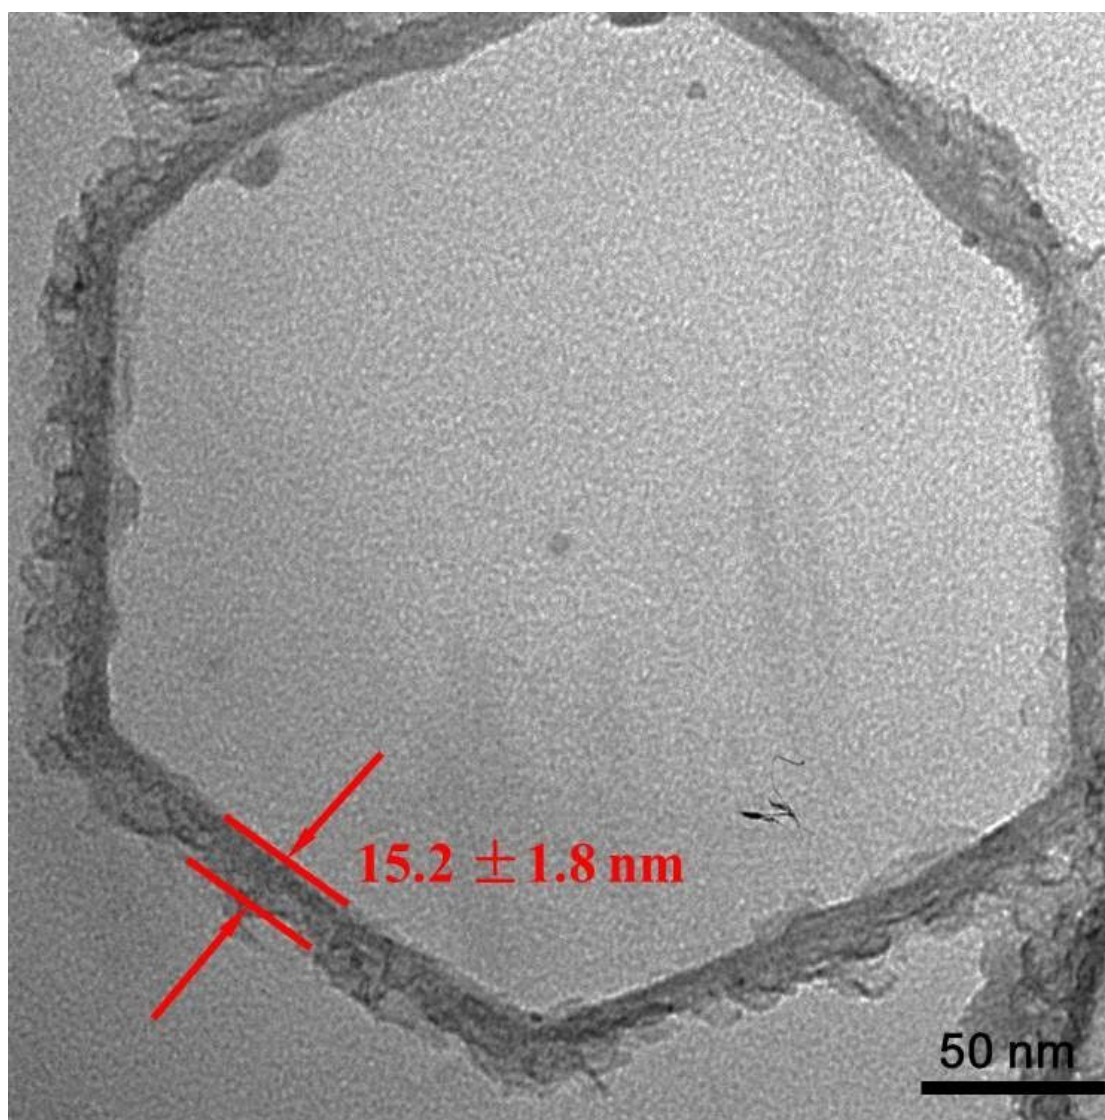

**Figure S6.** Representative TEM image of the single Mn doped Cu(OH)<sub>2</sub>-2 mL hexagonal nanoring.

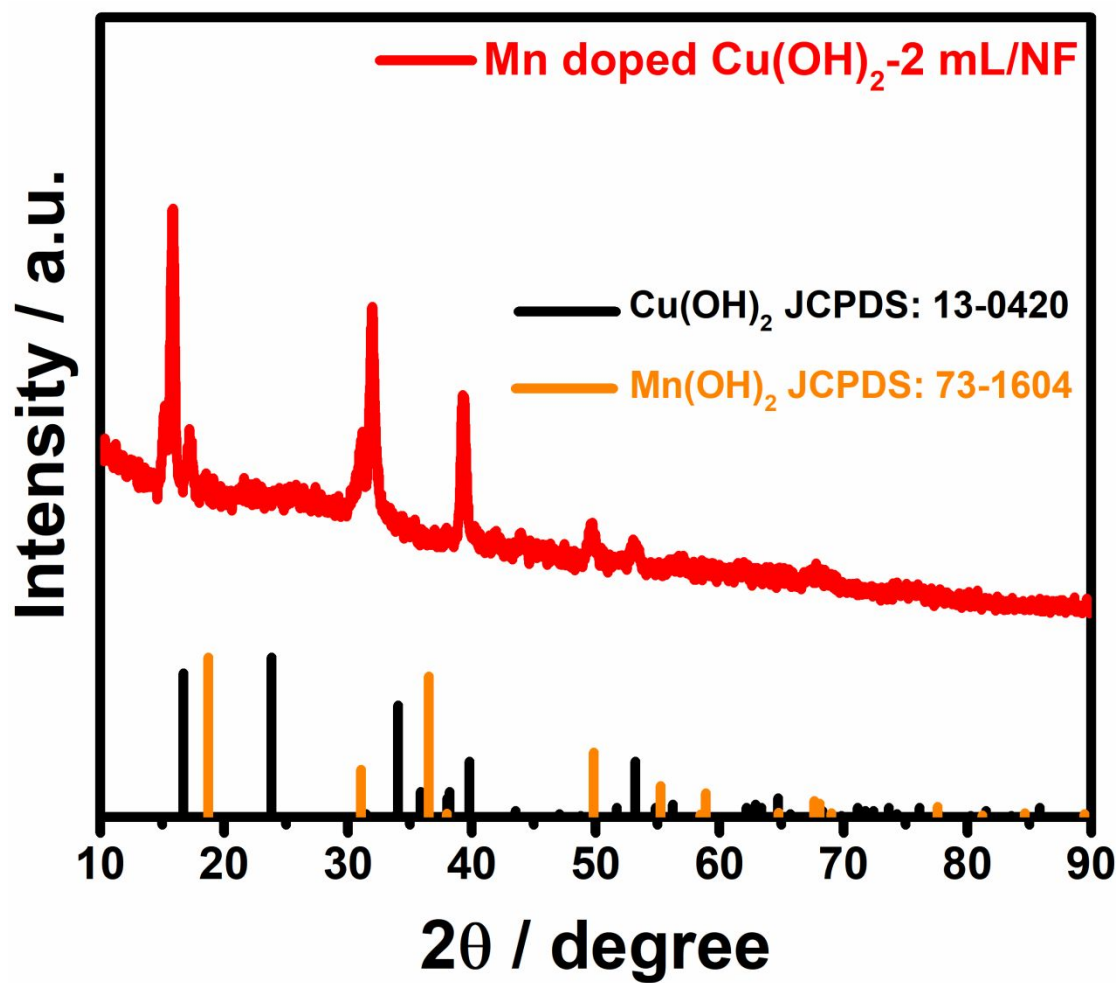

Figure S7. XRD pattern of Mn doped  $\text{Cu}(\text{OH})_2$ -2 mL hexagonal nanorings.



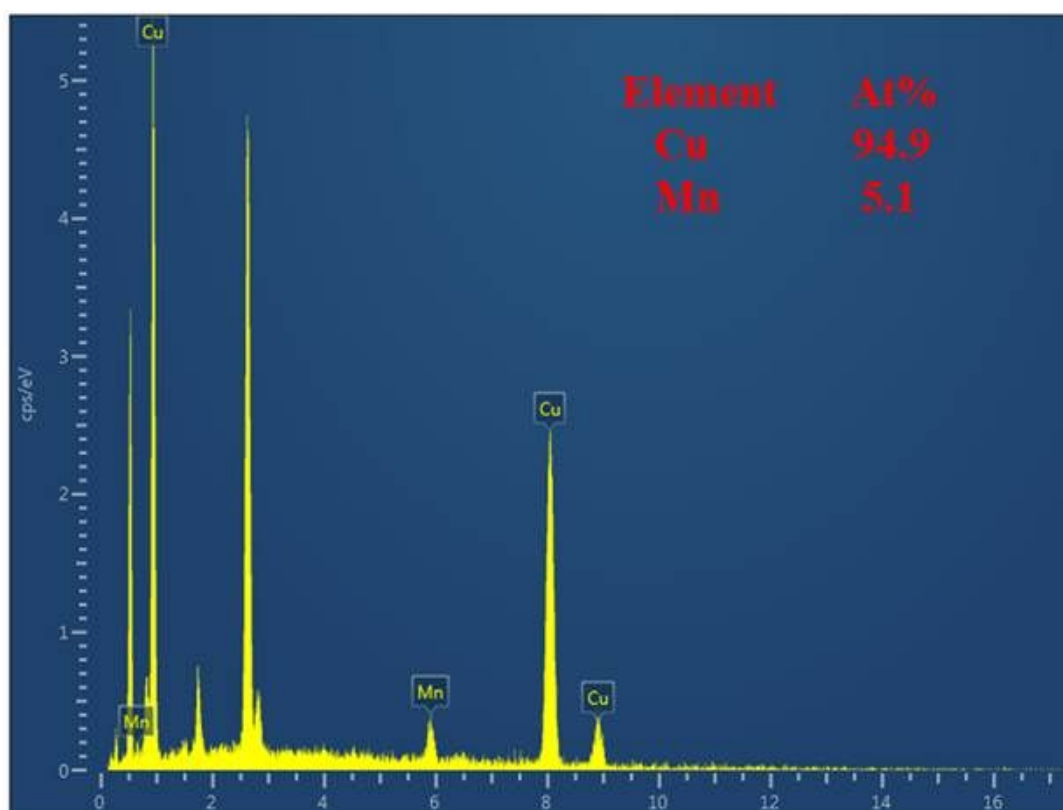

**Figure S8.** SEM-EDS spectrum image of Mn doped  $\text{Cu}(\text{OH})_2$ -2 mL hexagonal nanorings.

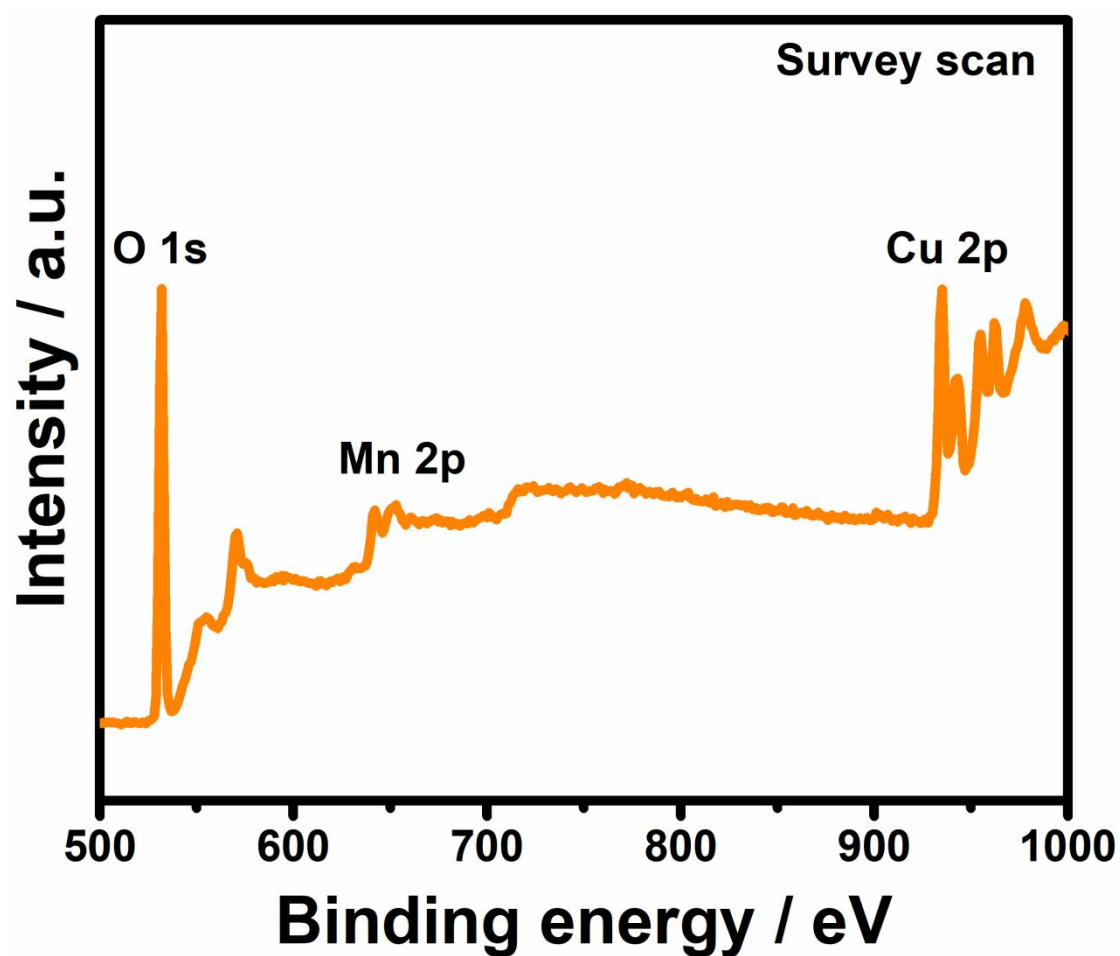

**Figure S9.** XPS survey spectrum of Mn doped  $\text{Cu}(\text{OH})_2$ -2 mL hexagonal nanorings.

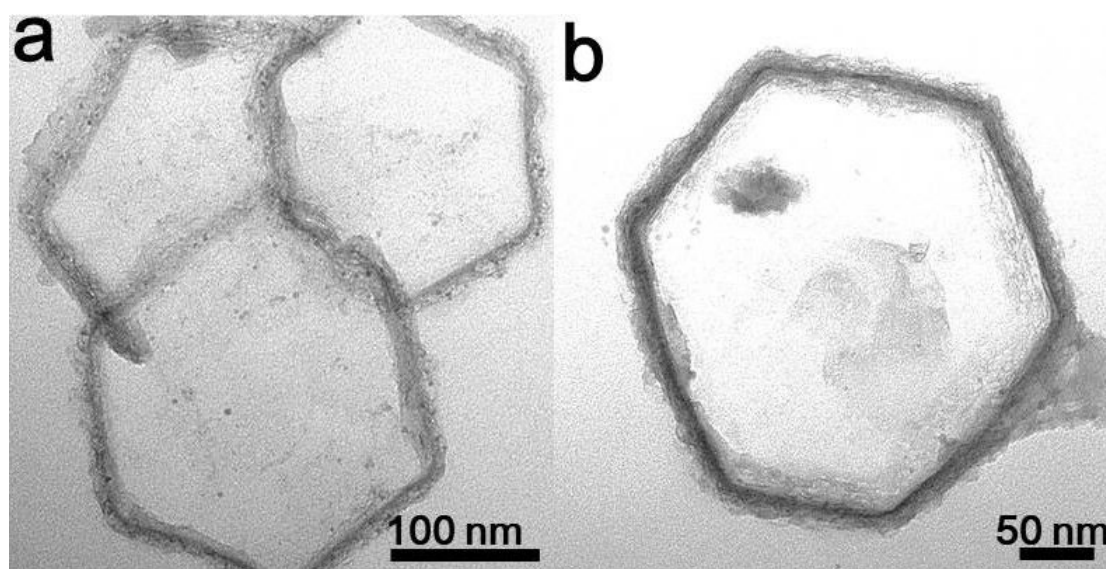

**Figure S10.** Representative TEM images of the (a and b) Mn doped  $\text{Cu}(\text{OH})_2$ -1 mL hexagonal nanoring with different magnifications.

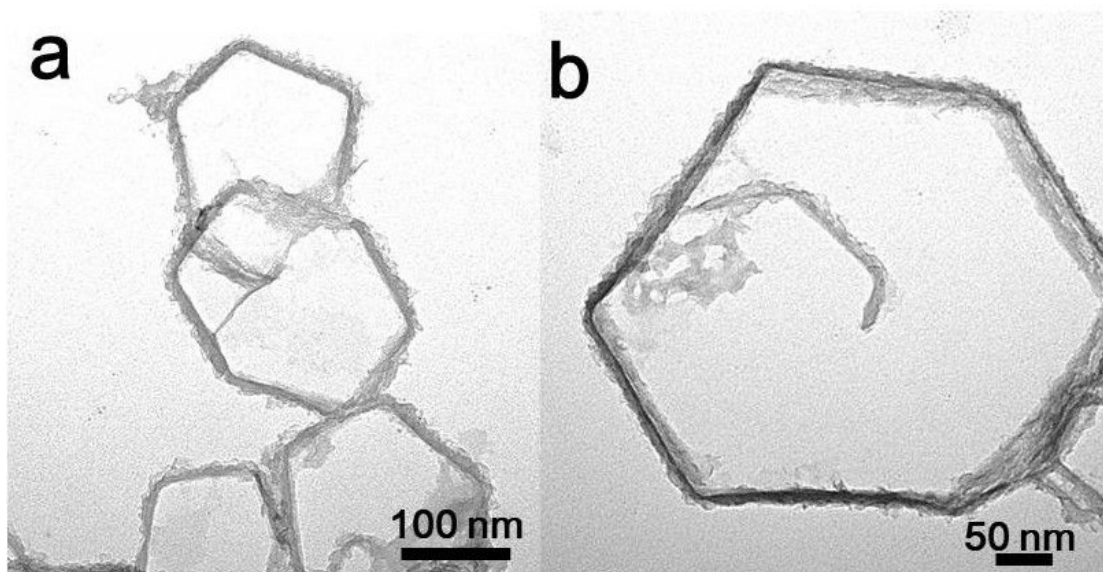

**Figure S11.** Representative TEM images of the (a and b) Mn doped  $\text{Cu}(\text{OH})_2$ -1 mL hexagonal nanoring with different magnifications.

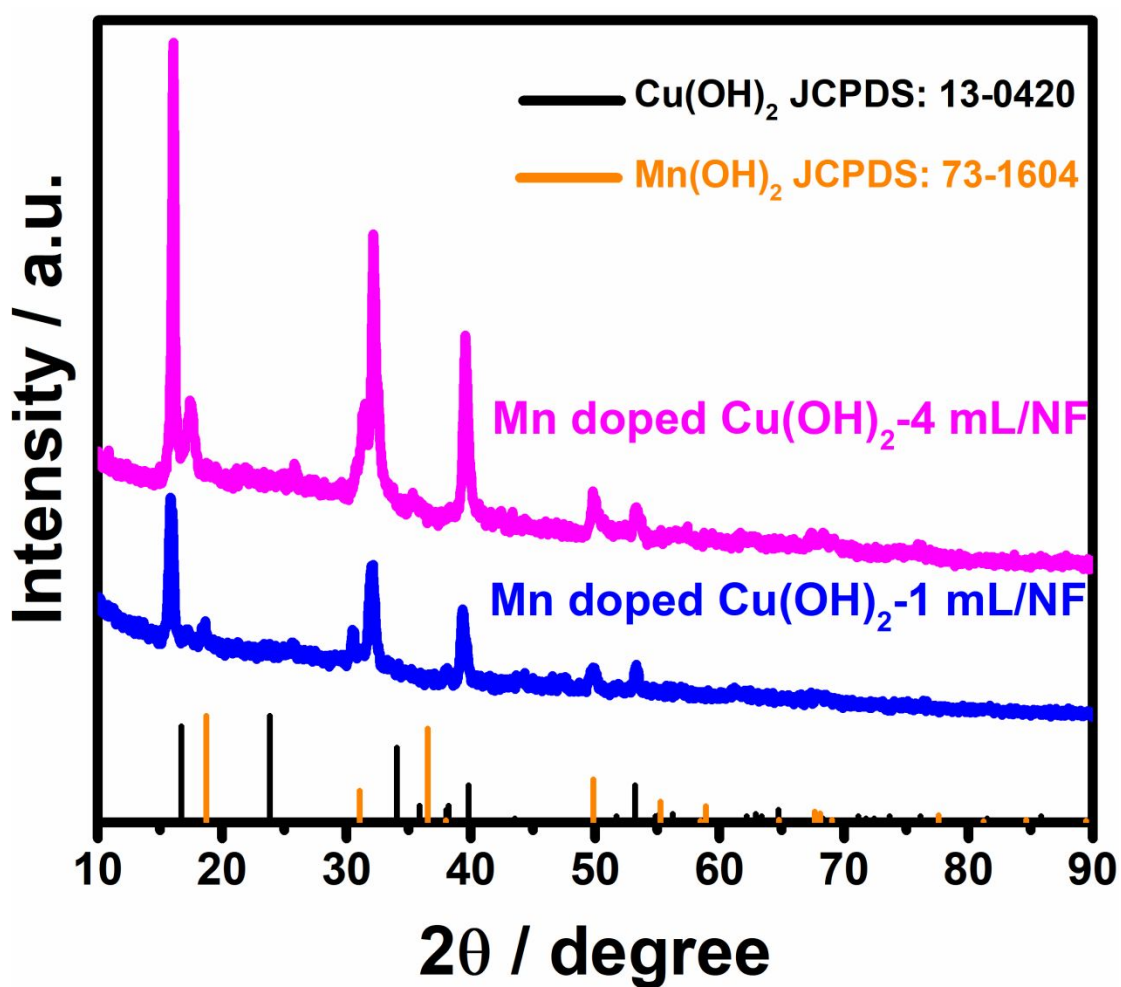

**Figure S12.** XRD patterns of Mn doped  $\text{Cu}(\text{OH})_2$ -1 mL and Mn doped  $\text{Cu}(\text{OH})_2$ -4 mL hexagonal nanorings.

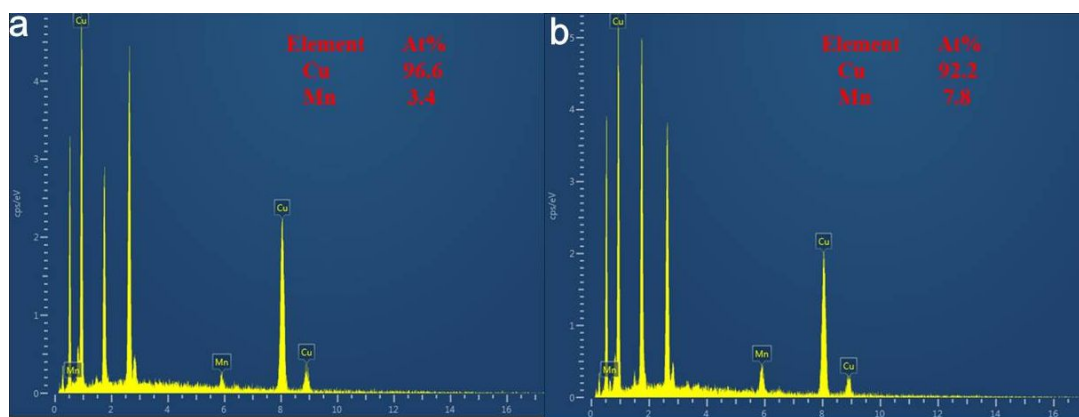

**Figure S13.** SEM-EDS spectrum images of (a) Mn doped Cu(OH)<sub>2</sub>-1 mL and (b) Mn doped Cu(OH)<sub>2</sub>-4 mL hexagonal nanorings.

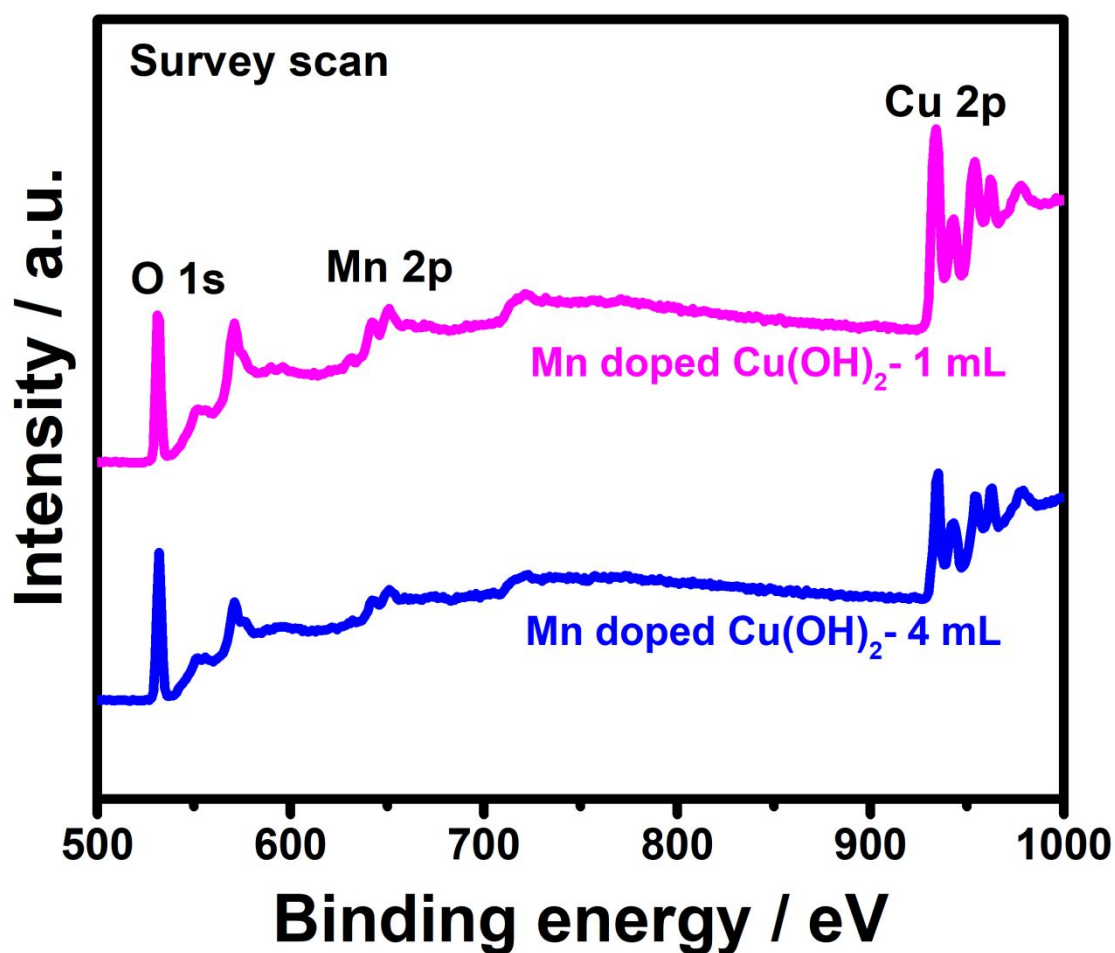

**Figure S14.** XPS survey spectra of Mn doped Cu(OH)<sub>2</sub>-1 mL and Mn doped Cu(OH)<sub>2</sub>-4 mL hexagonal nanorings.

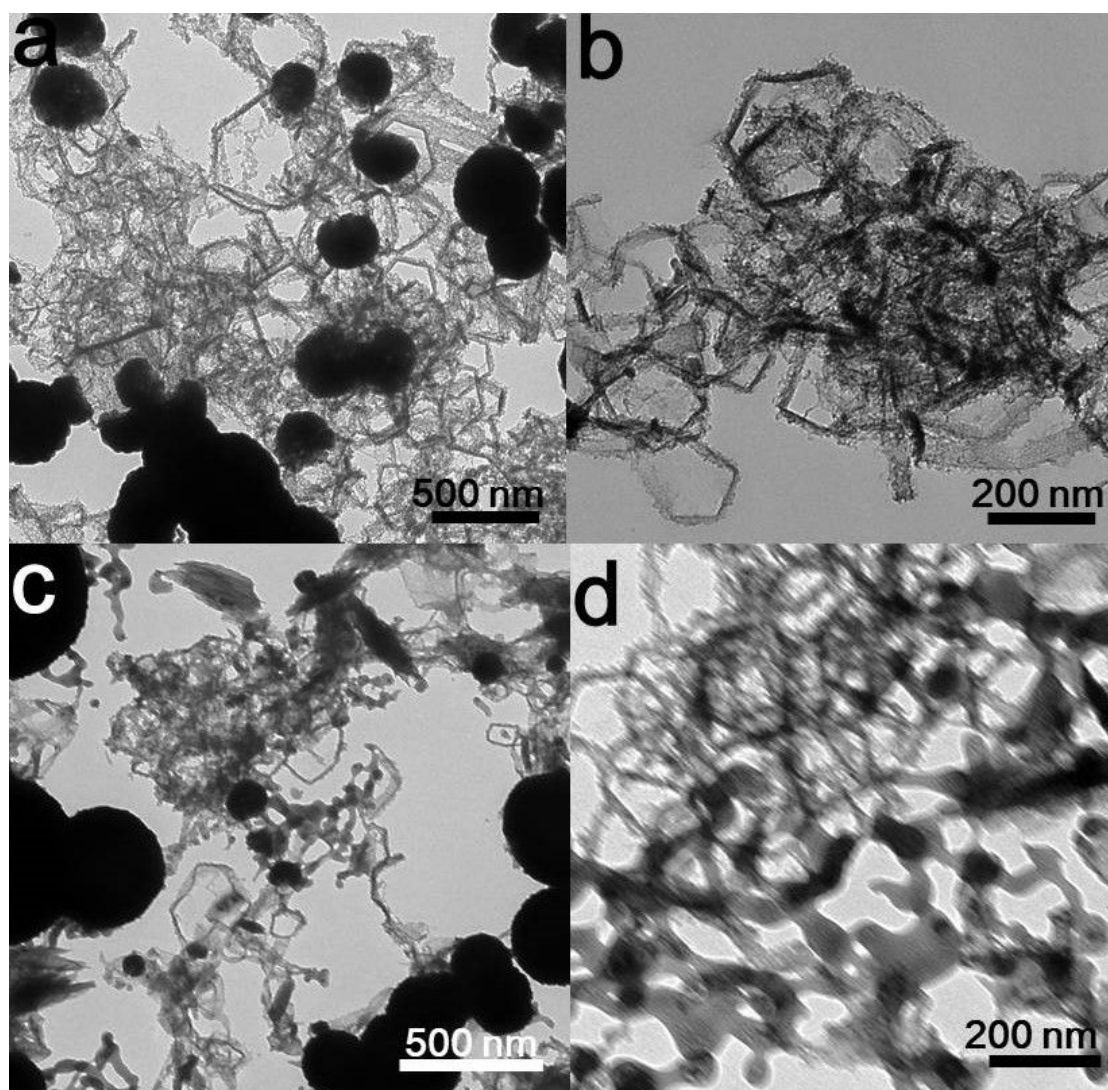

**Figure S15.** Representative TEM images of CuMn hydroxides prepared by replacing  $\text{CuCl}_2 \cdot 2\text{H}_2\text{O}$  with (a and b)  $\text{CuSO}_4$  and (c and d)  $\text{CuNO}_3$ , while keeping other reaction conditions remain the same. .



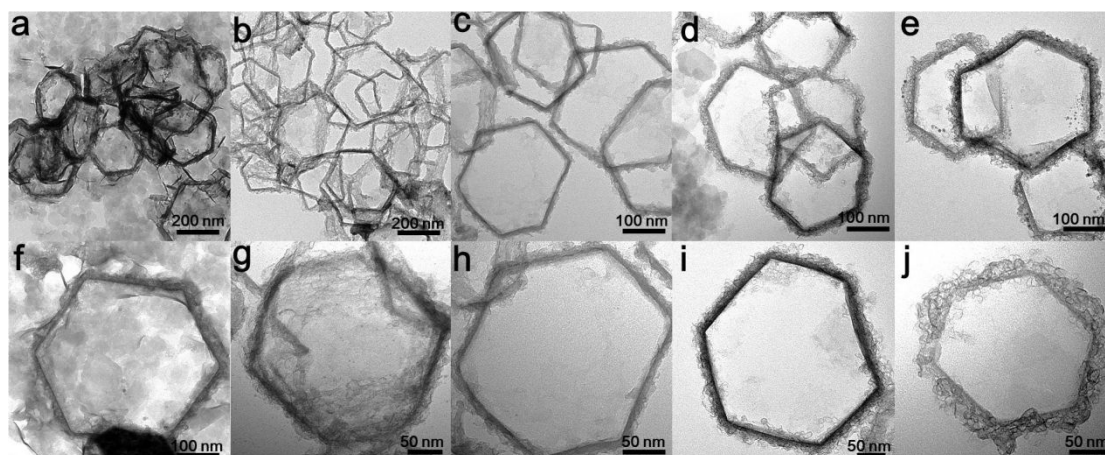

**Figure S16.** Representative TEM images of the intermediates of Mn doped  $\text{Cu}(\text{OH})_2$ -2 mL hexagonal nanoring with the reaction times of (a and f) 3 h, (b and g) 6 h, (c and h) 12 h, (d and i) 18 h, and (e and j) 24 h.

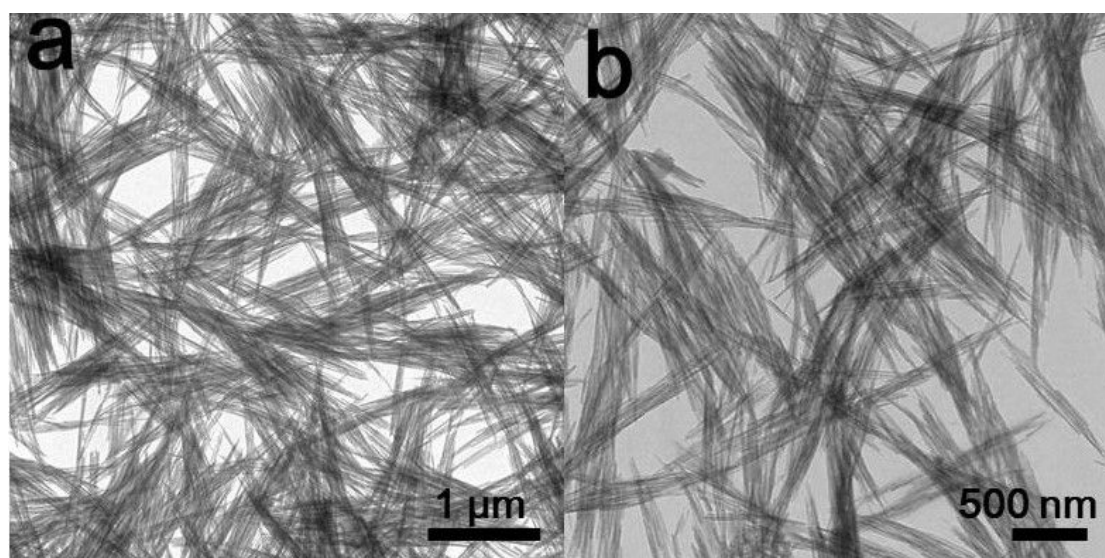

**Figure S17.** Representative TEM images of  $\text{Cu}(\text{OH})_2$  nanowires.



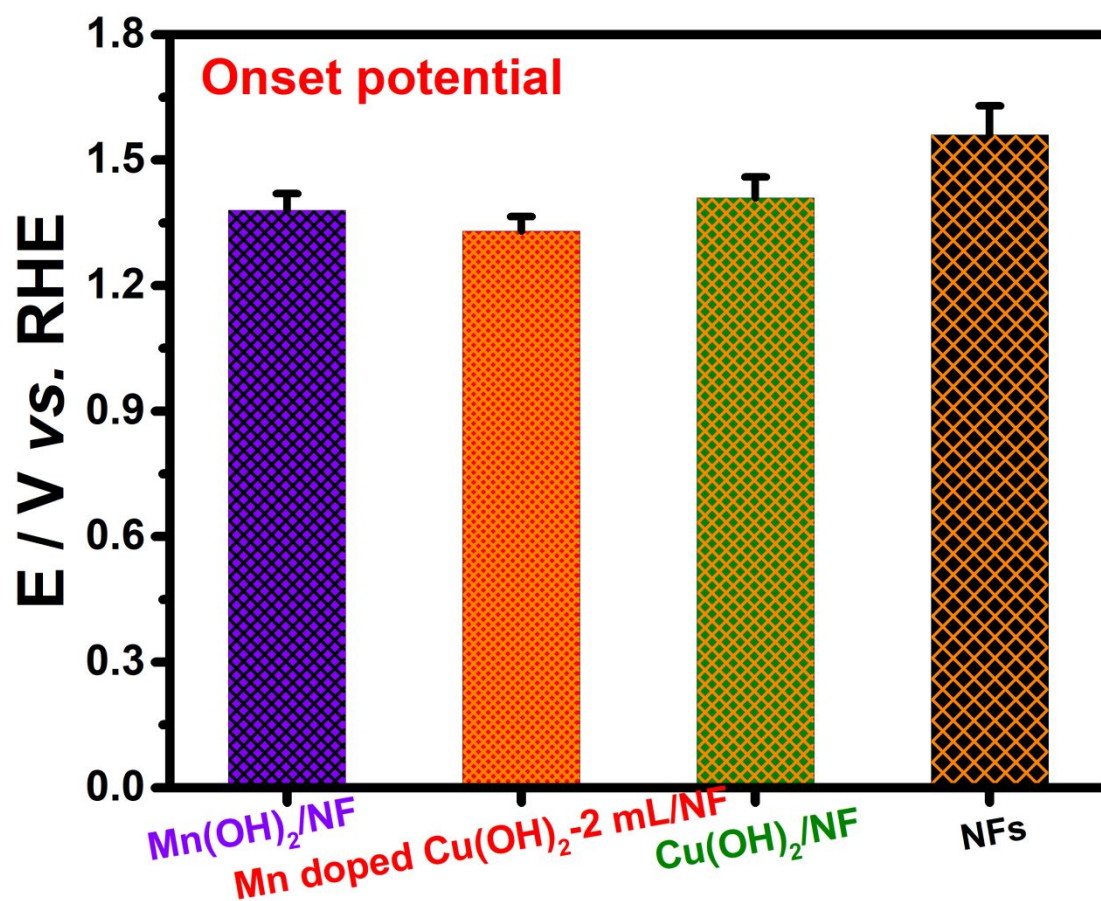

Figure S18. The onset potentials of different electrocatalysts.

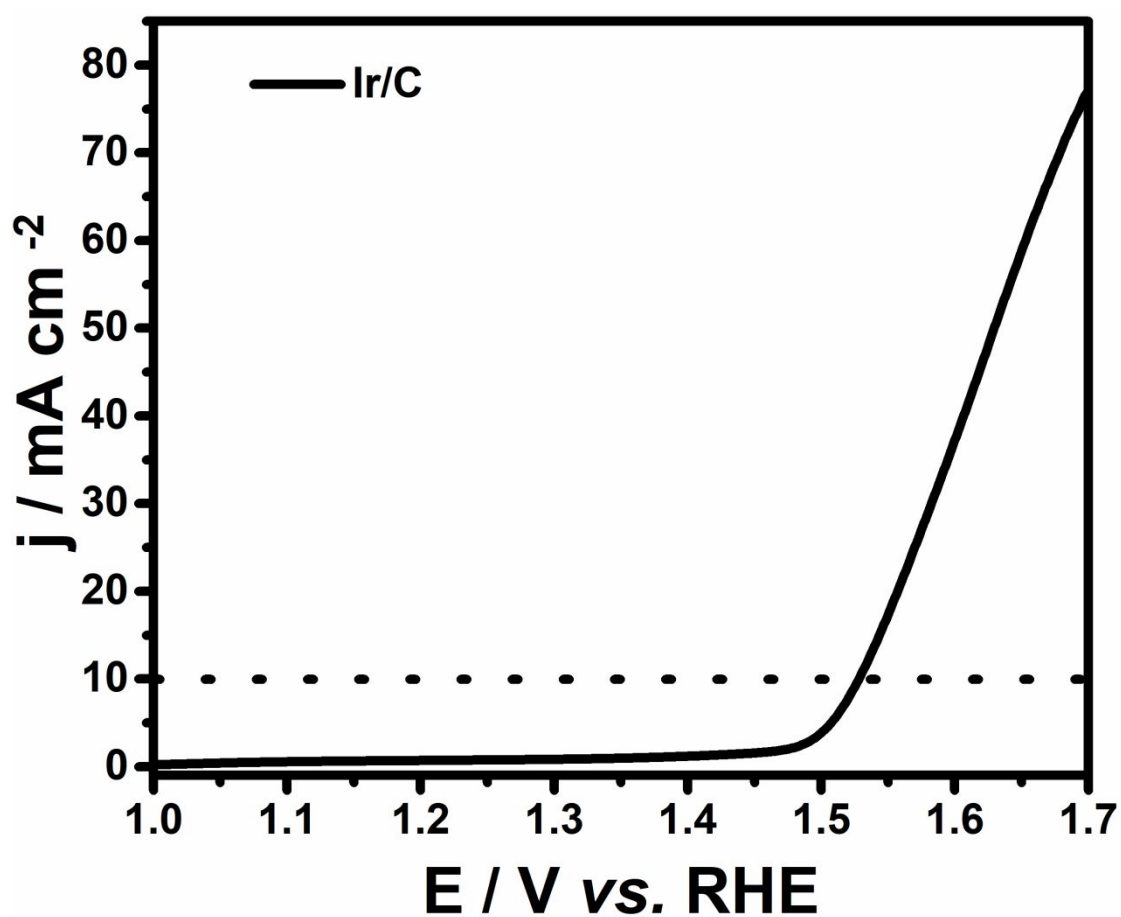

**Figure S19.** LSV polarization curve of commercial Ir/C catalyst in 1 M KOH solution at the scan rate of  $5 \text{ mV s}^{-1}$ .

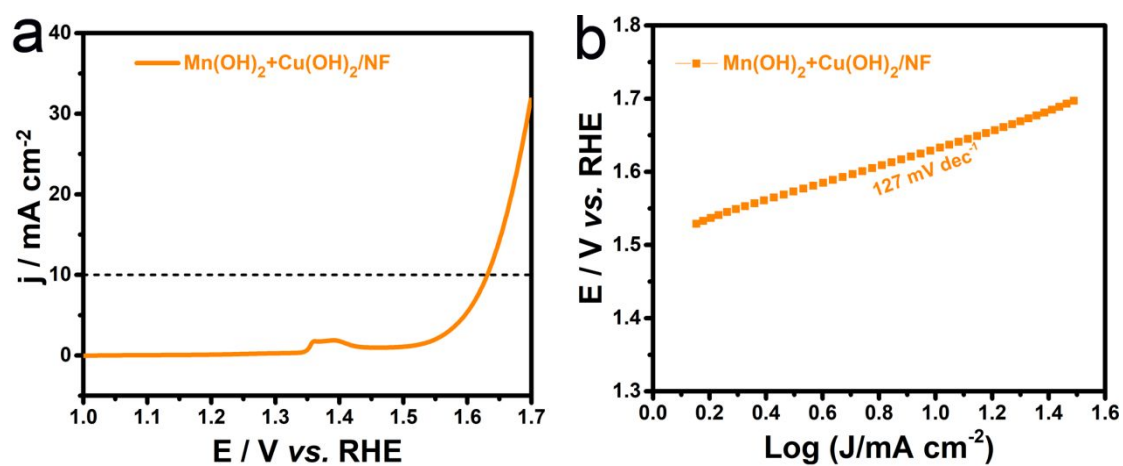

**Figure S20.** LSV polarization curve and Tafel slope of  $\text{Cu(OH)}_2 + \text{Mn(OH)}_2/\text{NF}$  in 1 M KOH solution at the scan rate of  $5 \text{ mV s}^{-1}$ .

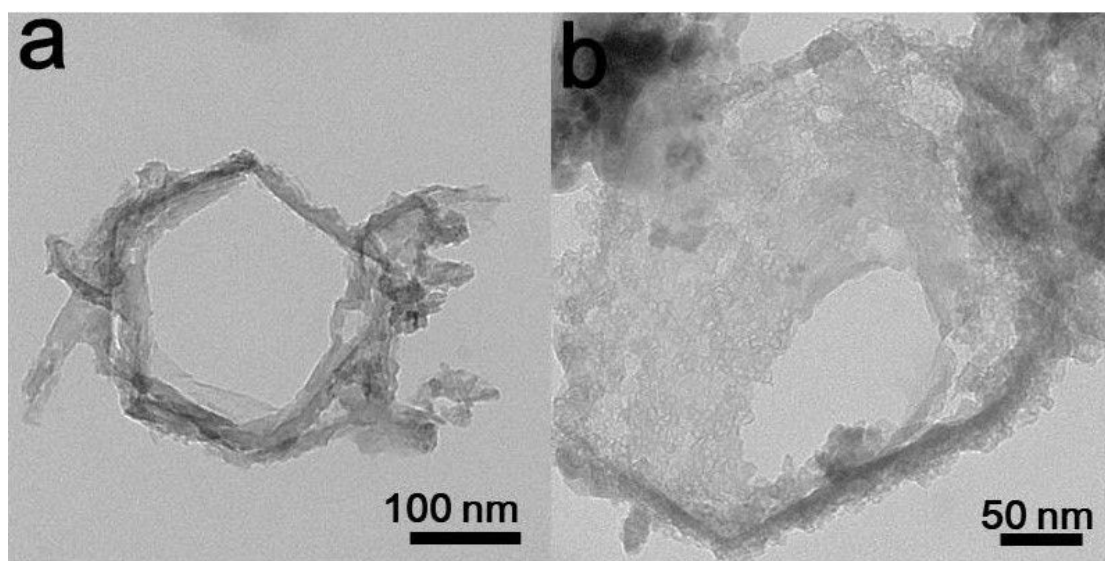

**Figure S21.** Representative TEM images of the Mn doped  $\text{Cu}(\text{OH})_2$ -2 mL hexagonal nanoring after long-term electrochemical measurements.

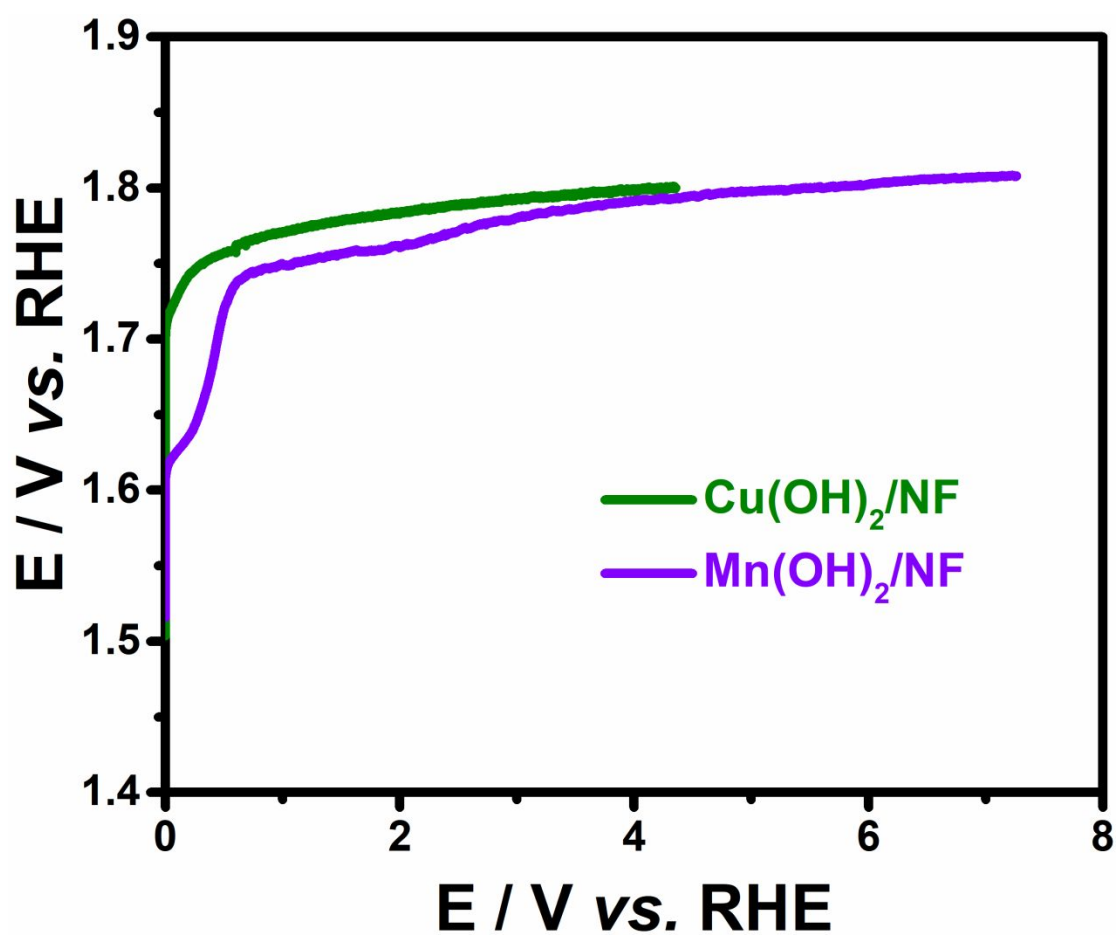

**Figure S22.** CP of  $\text{Cu}(\text{OH})_2$  /NF and  $\text{Mn}(\text{OH})_2$  /NF at  $10 \text{ mA cm}^{-2}$ .

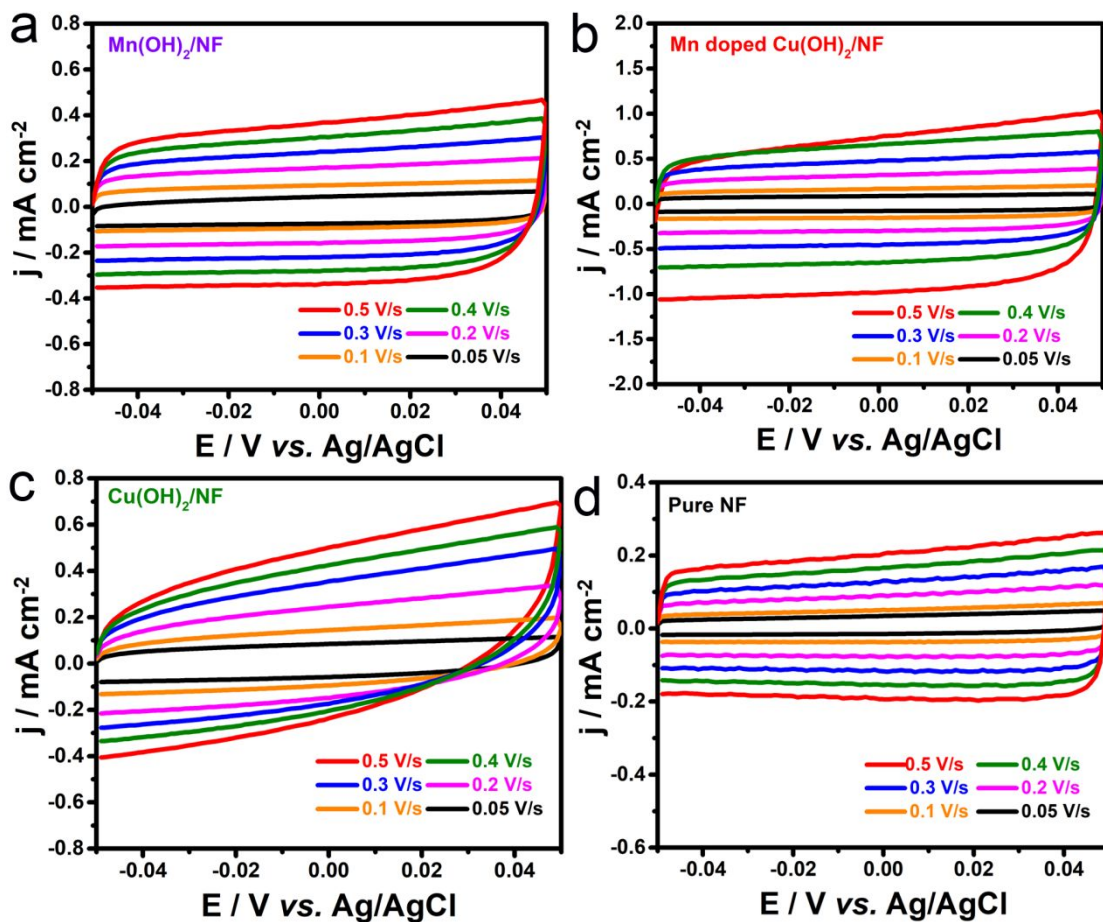

**Figure S23.** CV curves of (a)  $\text{Mn(OH)}_2/\text{NF}$ , (b) Mn doped  $\text{Cu(OH)}_2$ -2 mL/NF, (c)  $\text{Cu(OH)}_2/\text{NF}$ , and (d) NF.

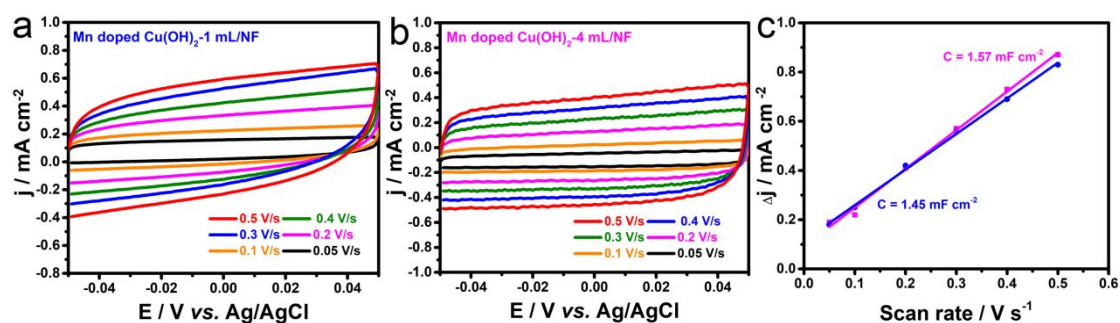

**Figure S24.** CV curves of (a) Mn doped  $\text{Cu(OH)}_2$ -1 mL and (b) Mn doped  $\text{Cu(OH)}_2$ -4 mL/NF. (c) Double layer currents of Mn doped  $\text{Cu(OH)}_2$ -1 mL and Mn doped  $\text{Cu(OH)}_2$ -4 mL/NF vs scan rates plots.

**Table S1** Comparisons of OER activity for Mn-based electrocatalysts in alkaline condition ( $\eta$ : overpotential at the current density of 10 mA cm<sup>-2</sup>).

| Catalyst                                                  | $\eta$ (mV) | Electrolyte | Reference                                |
|-----------------------------------------------------------|-------------|-------------|------------------------------------------|
| <b>Mn doped Cu(OH)<sub>2</sub> HNs</b>                    | <b>282</b>  | 1.0 M KOH   | <b>This work</b>                         |
| <b>MnO</b>                                                | 580         | 0.1 M KOH   | Chem. Commun. 2015, 51, 5951             |
| <b>MCO@PPy</b>                                            | 560         | 1.0 M KOH   | Electrochim. Acta 2015, 180, 788         |
| <b>MnO<sub>x</sub> nanowire</b>                           | >350        | 0.1 M KOH   | Int. J. Hydrogen Energy 2017, 42, 7157   |
| <b><math>\alpha</math>-MnO<sub>2</sub>/MIL-101(Cr)-40</b> | >470        | 1.0 M KOH   | Catal. Commun. 2014, 54, 17              |
| <b>MnO<sub>2</sub>/CFP</b>                                | 390         | 1.0 M KOH   | Adv. Funct. Mater. 2017, 27, 1704083     |
| <b>NiCoMnO<sub>4</sub>/NG</b>                             | >430        | 1.0 M KOH   | Appl. Mater. Environ. 2017, 201, 241-252 |
| <b>CoMn LDH</b>                                           | 324         | 1.0 M KOH   | J. Am. Chem. Soc. 2014, 136, 16481       |
| <b>CDs-MnO<sub>2</sub></b>                                | 343         | 1.0 M KOH   | Carbon 2019, 143, 457                    |

**Table S2** Comparisons of OER activity for Cu-based electrocatalysts in alkaline condition ( $\eta$ : overpotential at the current density of 10 mA cm<sup>-2</sup>).

| Catalyst                                | $\eta$ (mV) | Electrolyte                           | Reference                           |
|-----------------------------------------|-------------|---------------------------------------|-------------------------------------|
| <b>Mn doped Cu(OH)<sub>2</sub> HNs</b>  | <b>282</b>  | 1.0 M KOH                             | <b>This work</b>                    |
| Cu@NiFe LDHs                            | 310         | 1.0 M KOH                             | Energy Environ. Sci. 2017, 10, 1820 |
| Cu/(Cu(OH) <sub>2</sub> -CuO)<br>NA/CF  | 350         | 0.1 M KOH                             | Electrochim. Acta 2015, 163, 102    |
| Cu(OH) <sub>2</sub> -NWAs/Cu            | 560         | 0.1 M NaOH                            | ChemSusChem 2016, 9, 2069           |
| CuO NPs                                 | 290         | 1 M NaOH                              | Angew. Chem 2017, 56, 4792          |
| Cu <sub>2</sub> Se-Cu <sub>2</sub> O/TF | 465         | 1.0 M KOH                             | Chem. Commun 2018, 54, 4979         |
| CuO nanowires                           | 500         | 1.0 M Na <sub>2</sub> CO <sub>3</sub> | Nano Res. 2018, 11, 4323            |
| CuO                                     | 420         | 1.0 M KOH                             | Electrochim. Acta 2018, 263, 318    |
| Cu <sub>2</sub> O                       | 420         | 1.0 M KOH                             | Electrochim. Acta 2016, 187, 381    |
| MWCNT/CuO                               | 420         | 1.0 M KOH                             | J. Alloy Compds 2018, 735, 2311     |



**Table S3** Comparisons of OER activity for Co/Ni/Fe-based electrocatalysts in alkaline condition ( $\eta$ : overpotential at the current density of 10 mA cm<sup>-2</sup>).

| Catalyst                                                         | $\eta$ (mV) | Electrolyte | Reference                                  |
|------------------------------------------------------------------|-------------|-------------|--------------------------------------------|
| <b>Mn doped Cu(OH)<sub>2</sub> HNs</b>                           | <b>282</b>  | 1.0 M KOH   | <b>This work</b>                           |
| <b>Ir<sub>0.46</sub>Co<sub>0.54</sub>O<sub>y</sub> nanotubes</b> | 310         | 1.0 M KOH   | ACS Appl. Mater. Interface, 2017, 9, 35057 |
| <b>Ni<sub>3</sub>Se<sub>4</sub></b>                              | 320         | 1.0 M KOH   | Nanoscale 2018, 10, 5163                   |
| <b>CoO<sub>x</sub>-ZIF</b>                                       | 318         | 1.0 M KOH   | Adv. Funct. Mater. 2017, 1702546           |
| <b>Co<sub>3</sub>O<sub>4</sub>@CoO SC</b>                        | 430         | 1.0 M KOH   | Nat. Commun. 2015, 6, 8                    |
| <b>CoSe<sub>2</sub>/N-doped graphene</b>                         | 366         | 0.1 M KOH   | ACS Nano 2014, 8, 3970                     |
| <b>ZnCo LDH</b>                                                  | >330        | 1.0 M KOH   | J. Mater. Chem. A, 2014, 2, 13250          |
| <b>Co@Co-Bi/Ti</b>                                               | 327         | 1.0 M KOH   | Nanoscale 2017, 9, 16059                   |
| <b>Fe<sub>3</sub>O<sub>4</sub> cubes</b>                         | 336         | 1.0 M KOH   | ACS Energy Lett. 2018, 3, 861-868          |
| <b>Ni<sub>5</sub>P<sub>4</sub></b>                               | 470         | 1.0 M KOH   | Angew. Chem. Int. Ed. 2015, 54, 12361      |
| <b>CoO<sub>x</sub>-ZIF</b>                                       | 318         | 1.0 M KOH   | Adv. Funct. Mater. 2017, 1702546           |
| <b>Ni-Co oxides layers</b>                                       | 325         | 1.0 M KOH   | ACS Nano 2014, 8, 9518                     |
| <b>Au@Co<sub>3</sub>O<sub>4</sub></b>                            | 378         | 1.0 M KOH   | Adv. Mater. 2014, 26, 3950                 |
| <b>Co<sub>3</sub>O<sub>4</sub>@CoO SC</b>                        | 430         | 1.0 M KOH   | Nat. Commun. 2015, 6, 8.                   |
| <b>Ni-Co oxides layers</b>                                       | 325         | 1.0 M KOH   | ACS Nano 2014, 8, 9518                     |

Reference:

1. X. Zhang, Z. Xing, L. L. Wang, Y. C. Zhu, Q. W. Li, J. W. Liang, Y. Yu, T. Huang, K. B. Tang, Y. T. Qian, X. Y. Shen, *J. Mater. Chem.* **2012**, 22, 17864.
